# Supplementary material
Source: Springer Nature journal article supplement (https://www.springermedizin.de/resource/supplementary/13012_2011_579_MOESM7_ESM.pdf/9630020)

## Contextual factors

(antecedents\*)

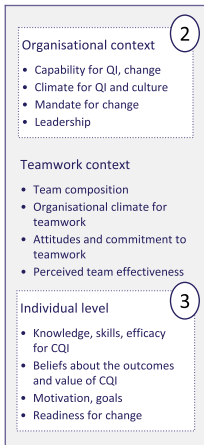

## CQI process

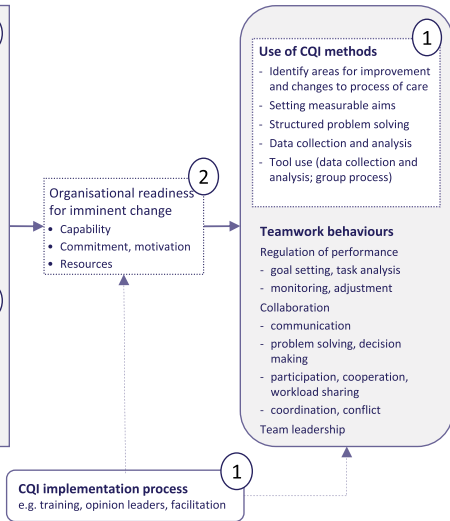

## Outcomes

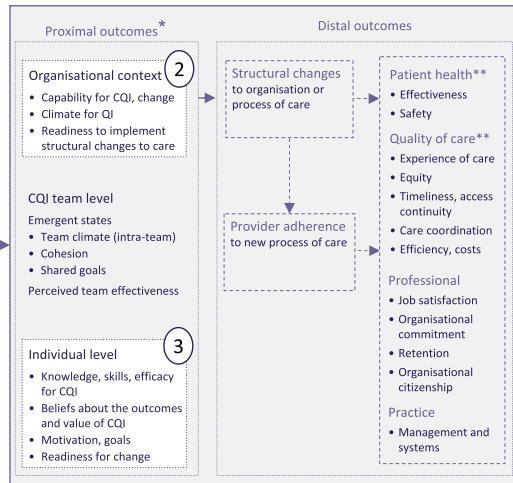

Supplement: MOESM7 [file 9630020]
